# Supplementary material for: Synthesis and evaluation of a large library of nitroxoline derivatives as pancreatic cancer antiproliferative agents
Source: PubMed Central journal article supplement (PMC7470072; doi:10.1080/14756366.2020.1780228), 2020-06-26

**Synthesis and evaluation of a large library of nitroxoline derivatives as pancreatic cancer  
antiproliferative agents**

Serena Veschi<sup>a</sup>, Simone Carradori<sup>a,\*</sup>, Laura De Lellis<sup>a</sup>, Rosalba Florio<sup>a</sup>, Davide Brocco<sup>a</sup>, Daniela Secci<sup>b</sup>, Paolo Guglielmi<sup>b</sup>, Mattia Spano<sup>b</sup>, Anatoly P. Sobolev<sup>c</sup>, Alessandro Cama<sup>a</sup>

<sup>a</sup>Department of Pharmacy, “G. d’Annunzio” University of Chieti-Pescara, Chieti 66100, Italy

<sup>b</sup>Dipartimento di Chimica e Tecnologie del Farmaco, Sapienza Università di Roma, Rome 00185, Italy

<sup>c</sup>Istituto per i Sistemi Biologici, Laboratorio di Risonanza Magnetica “Segre-Capitani”, CNR, Via Salaria Km 29.300, 00015 Monterotondo (Rome), Italy

\*Corresponding author: Simone Carradori PhD, Department of Pharmacy, “G. d’Annunzio” University of Chieti-Pescara, Chieti 66100, Italy; Tel. +39 0871 3554583; e-mail: [simone.carradori@unich.it](mailto:simone.carradori@unich.it)

**Figure S1. Concentration-response curves of compounds 24, 33, 36, 40 and 44 on viability of PC cell lines.** We analyzed by MTT the effect of compounds 24, 33, 36, 40 and 44 on the viability of AsPC-1, Capan-2 and BxPC-3 treated for 48 hours at concentrations ranging from 0 (vehicle, control) to 54  $\mu\text{M}$ . The compounds affected cell viability in a dose-dependent manner, with distinct sensitivities for the three PC cell lines. Data shown are the means  $\pm$ SD of two MTT assays with quintuplicate determinations. Statistically significant differences between control and each compound concentration were expressed as \* $p < 0.05$ ; \*\* $p < 0.01$ ; \*\*\* $p < 0.001$ ; \*\*\*\* $p < 0.0001$ .

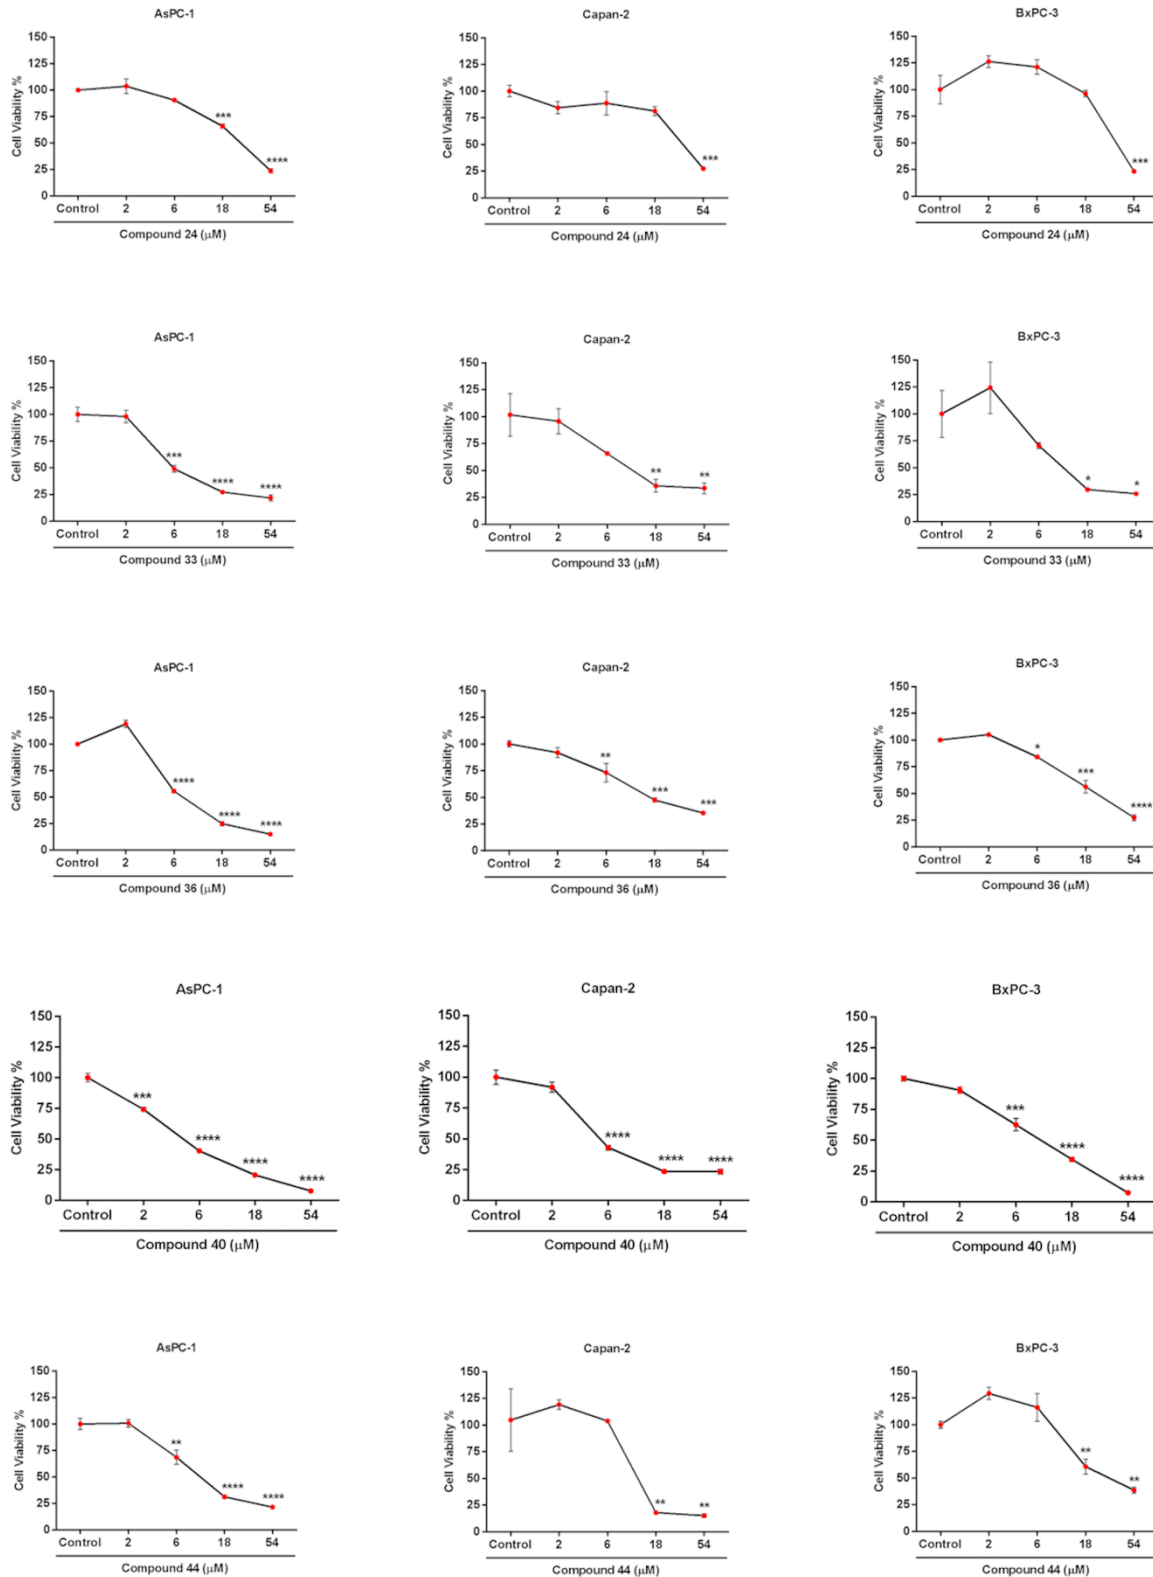

**Figure S2. Concentration-response curves of nitroxoline and compounds 40 on viability of normal HFF-1 fibroblast cells.** We analyzed by MTT the effect of nitroxoline and compound 40 on viability of HFF-1 treated for 48 hours at concentrations ranging from 0 (vehicle, control) to 54  $\mu\text{M}$ .  $\text{IC}_{50}$  values of both nitroxoline and compound 40 were higher than those obtained in PC cancer cell lines (Table 1).  $\text{IC}_{50}$  values were calculated by CompuSyn software. Data shown are the means  $\pm$ SD of two MTT assays with quintuplicate determinations. Statistically significant differences between control and each compound concentration were expressed as  $**p < 0.01$ ;  $***p < 0.001$ ;  $****p < 0.0001$ .

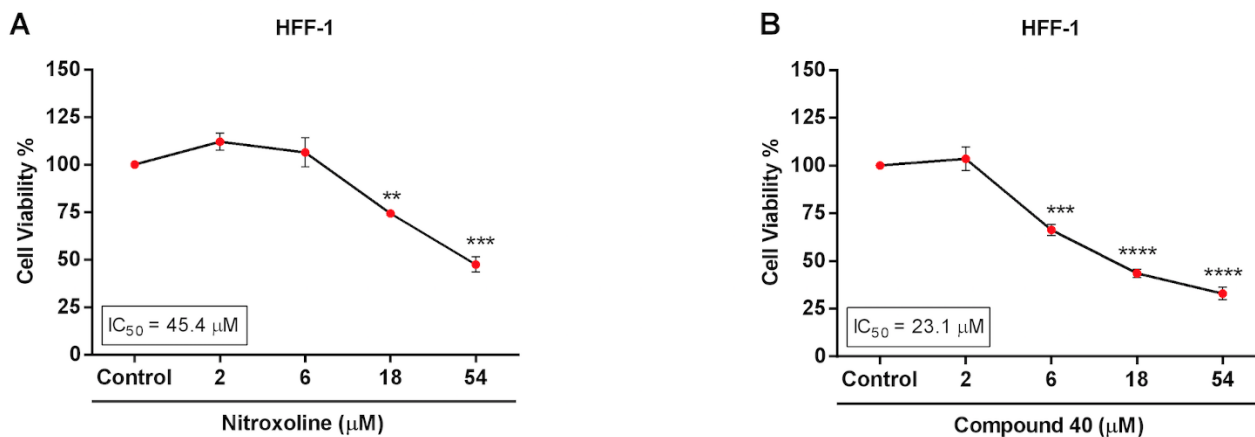

Supplement: IENZ_A_1780228_SM4090.pdf [file IENZ_A_1780228_SM4090.pdf]
